# Supplementary material for: Proposal for a Standard Protocol to Assess the Rheological Behavior of Thickening Products for Oropharyngeal Dysphagia
Source: MDPI journal article supplement (doi:10.3390/nu14235028), 2022-11-25
Supplement: s1 [file s1]

## Supplementary Materials

**Table S1.** Index flow, consistency and shear thinning effect from 50 to 300 s<sup>-1</sup> for daily condition (DC) doses.

| DC doses                                       |                         |                 |                    |
|------------------------------------------------|-------------------------|-----------------|--------------------|
| Target viscosity (mPa·s) at 50 s <sup>-1</sup> | Index flow ( <i>n</i> ) | Consistency (K) | Shear thinning (%) |
| 100                                            | 0.29                    | 3.1             | 77.1               |
| 200                                            | 0.19                    | 3.7             | 76.5               |
| 400                                            | 0.16                    | 4.0             | 78.0               |
| 800                                            | 0.16                    | 4.3             | 77.8               |
| 1600                                           | 0.17                    | 4.6             | 77.2               |

DC: Daily condition.

**Table S2.** Viscosity values (mean±SD) by standing time for 200 and 800 mPa·s; *p* > 0.05 (ns).

| 200 mPa·s (Target viscosity at 50 s <sup>-1</sup> ) |                                                    |                           |                 | 800 mPa·s (Target viscosity at 50 s <sup>-1</sup> ) |                           |                 |
|-----------------------------------------------------|----------------------------------------------------|---------------------------|-----------------|-----------------------------------------------------|---------------------------|-----------------|
| Standing time (min)                                 | Viscosity (mPa·s) at 50 s <sup>-1</sup> (mean±SD)  | Differences 0-120 min (%) | <i>p</i> -value | Viscosity (mPa·s) at 50 s <sup>-1</sup> (mean±SD)   | Differences 0-120 min (%) | <i>p</i> -value |
| 0                                                   | 183.3±11.0                                         | 16.6                      | 0.46            | 848.2±38.4                                          | 10.2                      | 0.054           |
| 30                                                  | 177.0±9.0                                          |                           |                 | 827.1±42.7                                          |                           |                 |
| 60                                                  | 169.5±8.3                                          |                           |                 | 784.9±32.7                                          |                           |                 |
| 90                                                  | 167.5±15.3                                         |                           |                 | 809.4±38.4                                          |                           |                 |
| 120                                                 | 152.9±19.1                                         |                           |                 | 762.1±39.4                                          |                           |                 |
| 200 mPa·s (Target viscosity at 50 s <sup>-1</sup> ) |                                                    |                           |                 | 800 mPa·s (Target viscosity at 50 s <sup>-1</sup> ) |                           |                 |
| Standing time (min)                                 | Viscosity (mPa·s) at 300 s <sup>-1</sup> (mean±SD) | Differences 0-120 min (%) | <i>p</i> -value | Viscosity (mPa·s) at 300 s <sup>-1</sup> (mean±SD)  | Differences 0-120 min (%) | <i>p</i> -value |
| 0                                                   | 42.1±2.0                                           | 14.9                      | 0.051           | 166.0±35.3                                          | 3.9                       | 0.40            |
| 30                                                  | 41.1±1.5                                           |                           |                 | 157.7±5.9                                           |                           |                 |
| 60                                                  | 38.5±0.3                                           |                           |                 | 159.2±3.1                                           |                           |                 |
| 90                                                  | 39.2±2.2                                           |                           |                 | 159.4±2.3                                           |                           |                 |
| 120                                                 | 35.8±3.9                                           |                           |                 | 159.6±2.9                                           |                           |                 |

**Table S3.** Viscosity values (mean±SD) by increasing temperature from 20°C to 40°C for 200 and 800 mPa·s levels for daily conditions doses; *p* > 0.05 (ns).

| Temperature<br>(°C) | 200 mPa·s (Target viscosity at 50 s <sup>-1</sup> ) |                           |                 | 800 mPa·s (Target viscosity at 50 s <sup>-1</sup> ) |                           |                 |
|---------------------|-----------------------------------------------------|---------------------------|-----------------|-----------------------------------------------------|---------------------------|-----------------|
|                     | Viscosity (mPa·s)                                   | Differences<br>0-40°C (%) | <i>p</i> -value | Viscosity (mPa·s)                                   | Differences<br>0-40°C (%) | <i>p</i> -value |
|                     | at 50 s <sup>-1</sup><br>(mean±SD)                  |                           |                 | at 50 s <sup>-1</sup><br>(mean±SD)                  |                           |                 |
| 20                  | 190.2±6.5                                           | 6.3                       | 0.17            | 848.2±38.4                                          | 5.9                       | 0.09            |
| 25                  | 180.5±5.8                                           |                           |                 | 827.1±42.7                                          |                           |                 |
| 30                  | 185.3±15.3                                          |                           |                 | 784.9±32.7                                          |                           |                 |
| 35                  | 181.6±5.6                                           |                           |                 | 809.4±38.4                                          |                           |                 |
| 40                  | 178.1±8.9                                           |                           |                 | 762.1±39.4                                          |                           |                 |
| Temperature<br>(°C) | 200 mPa·s (Target viscosity at 50 s <sup>-1</sup> ) |                           |                 | 800 mPa·s (Target viscosity at 50 s <sup>-1</sup> ) |                           |                 |
|                     | Viscosity (mPa·s)                                   | Differences<br>0-40°C (%) | <i>p</i> -value | Viscosity (mPa·s)                                   | Differences<br>0-40°C (%) | <i>p</i> -value |
|                     | at 300 s <sup>-1</sup>                              |                           |                 | at 300 s <sup>-1</sup>                              |                           |                 |

|    | (mean±SD) |     |      | (mean±SD)   |     |      |
|----|-----------|-----|------|-------------|-----|------|
| 20 | 42.4±3.1  |     |      | 166.03±5.34 |     |      |
| 25 | 39.7±0.9  |     |      | 157.70±5.90 |     |      |
| 30 | 42.8±2.2  | 7.0 | 0.20 | 159.23±3.10 | 5.8 | 0.11 |
| 35 | 42.0±1.9  |     |      | 159.43±2.27 |     |      |
| 40 | 39.4±0.3  |     |      | 159.57±2.87 |     |      |

**Table S4.** Index flow, consistency and shear thinning effect from 50 to 300 s<sup>-1</sup> for VFS doses.

| VFS doses                                      |                         |                 |                    |
|------------------------------------------------|-------------------------|-----------------|--------------------|
| Target viscosity at 50 s <sup>-1</sup> (mPa·s) | Index flow ( <i>n</i> ) | Consistency (K) | Shear thinning (%) |
| 100                                            | 0.32                    | 3.1             | 70.2               |
| 200                                            | 0.23                    | 3.7             | 75.5               |
| 400                                            | 0.16                    | 4.1             | 77.4               |
| 800                                            | 0.16                    | 4.4             | 78.1               |
| 1600                                           | 0.18                    | 4.6             | 77.0               |

VFS: videofluoroscopy.

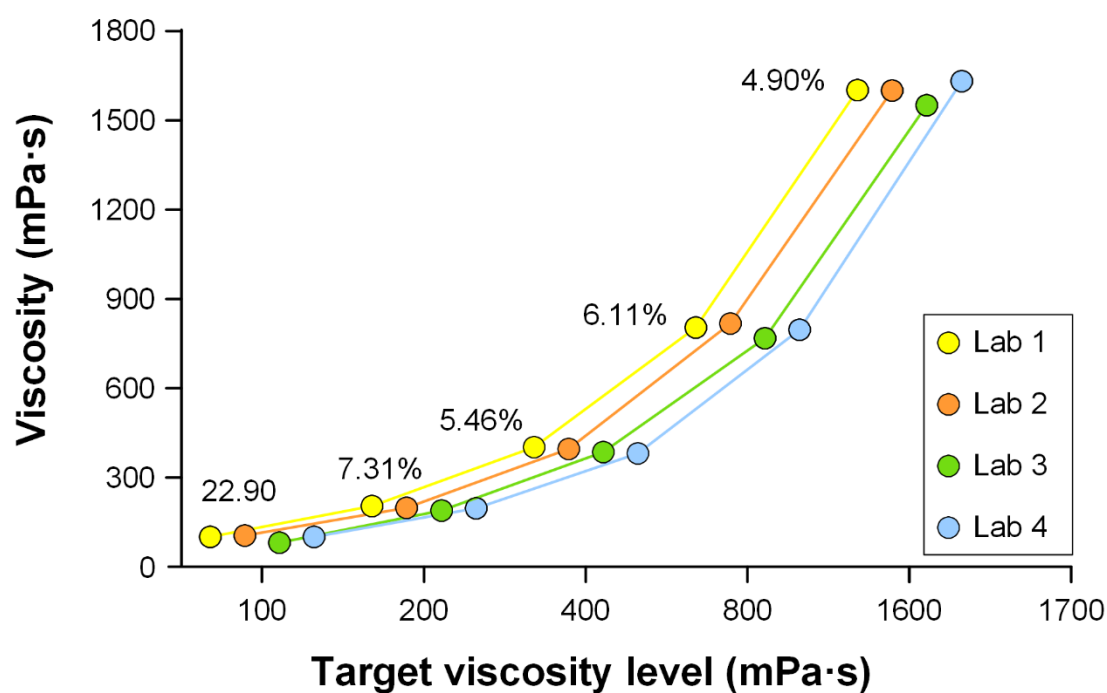

**Figure S1.** Inter-laboratory variability for each shear viscosity level tested (100, 200, 400, 800 and 1600 mPa·s).

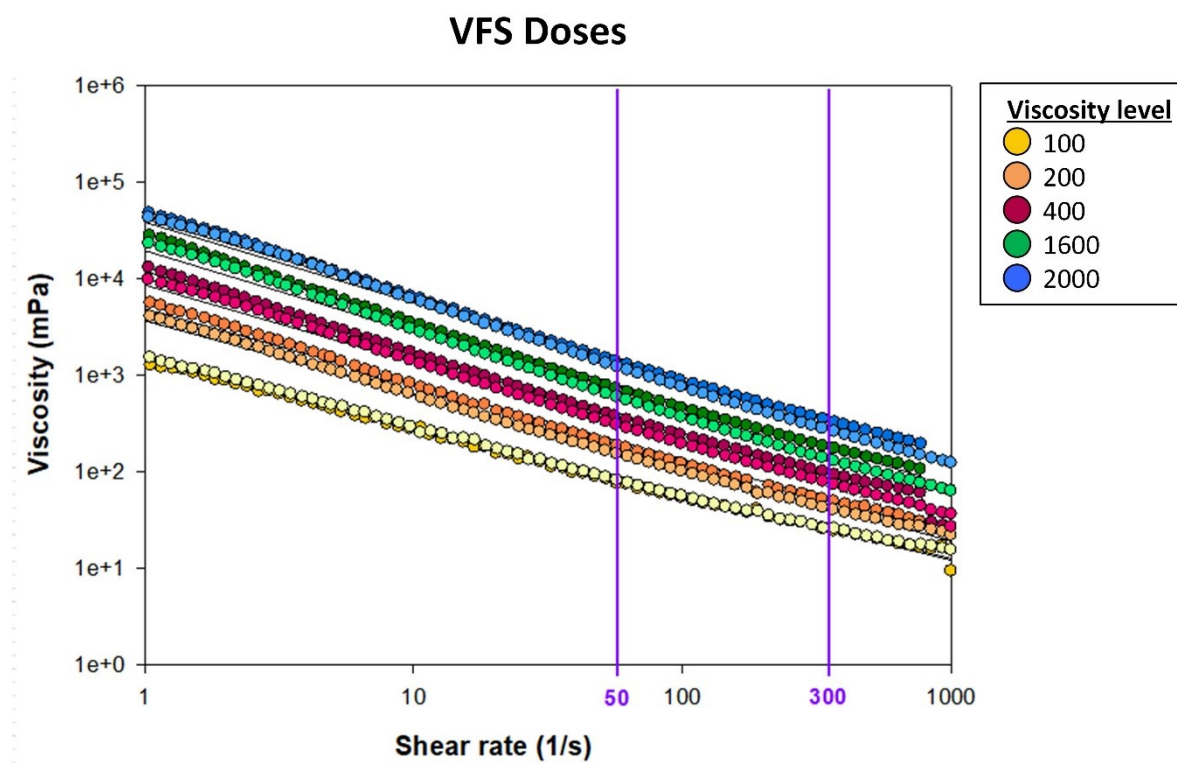

**Figure S2.** Viscosity curves from a shear rate range of 1–1000 s<sup>−1</sup> for videofluoroscopy doses before and after oral incubation in healthy volunteers. Dark colors correspond to viscosity levels pre-oral incubation. Soft colors correspond to viscosity post-oral incubation. Purple lines mark the two main shear rate landmarks (50 and 300 s<sup>−1</sup>) during deglutition in patients with oropharyngeal dysphagia.

#### Supplementary Information S1: Normalized protocol to determine shear viscosity for thickening

##### 1. Material and equipment

- Solvent: thickening product
- Dissolvent: mineral water, alimentary fluid, X-ray contrast
- Equipment to measure shear viscosity: viscometer or rheometer
- Stirrer: Metallic spatula
- Container: Glass beakers or clear plastic cups
- Chronometer
- Plastic Syringe (minimal volume: 20 mm)

##### 2. Participants

In order to perform the *ex vivo* salivary amylase effect, participants will be needed to

##### 3. Preparation mode

- a) Weigh the dissolvent in a clear plastic cup
- b) Weigh the solvent in another cup
- c) Initiate the chronometer and add the solvent to the dissolvent over 5 s while stirring at 4 rps with a metallic spatula
- d) Continue stirring for 30 s at the same velocity

- e) Leave the prepared sample resting for 10min

### 3. Sample analysis

#### In vitro shear rate effect

- f) Analyze viscosity by increasing shear rate from 0 to 1000 s<sup>-1</sup> in a 10 minute test at 25°C
- g) Interpolate the viscosity values at 50 and 300 s<sup>-1</sup> to obtain the apparent viscosity value in the oral and pharyngeal phase, respectively
- h) Repeat the process from step 'a' to 'e' two times more to obtain triplicates

#### Ex vivo salivary amylase effect

- f) Volunteer / patient preparation: give to the patient water to clean the mouth performing intra-oral movements for 10 s. Remove the water.
- g) Take 15 ml of the prepared sample with a plastic syringe and give it to the volunteer / patient. Ask them to maintain the sample in the oral cavity by performing intra-oral movements for 30s and then to spit it
- h) Analyze viscosity by increasing shear rate from 0 to 1000 s<sup>-1</sup> in a 10 minute test at 25°C
- i) Interpolate the viscosity values at 50 and 300 s<sup>-1</sup> to obtain the apparent viscosity value in the oral and pharyngeal phase, respectively
- j) Repeat the process from step 'a' to 'e' two times more to obtain triplicates
- k) Repeat the process for the needed number of participants
